# Supplementary material for: Polydopamine-Coated Co3O4 Nanoparticles as an Efficient Catalase Mimic for Fluorescent Detection of Sulfide Ion
Source: MDPI journal article supplement (doi:10.3390/bios12111047), 2022-11-19
Supplement: s1 [file s1]

# Supplementary Materials

## Polydopamine-Coated $\text{Co}_3\text{O}_4$ Nanoparticles as an Efficient Catalase Mimic for Fluorescent Detection of Sulfide Ion

Trung Hieu Vu, Phuong Thy Nguyen, and Moon Il Kim \*

Department of BioNano Technology, Gachon University, 1342 Seongnamdaero, Sujeong-gu, Seongnam 13120, Republic of Korea

\* Correspondence: moonil@gachon.ac.kr; Tel.: +82-31-750-8563

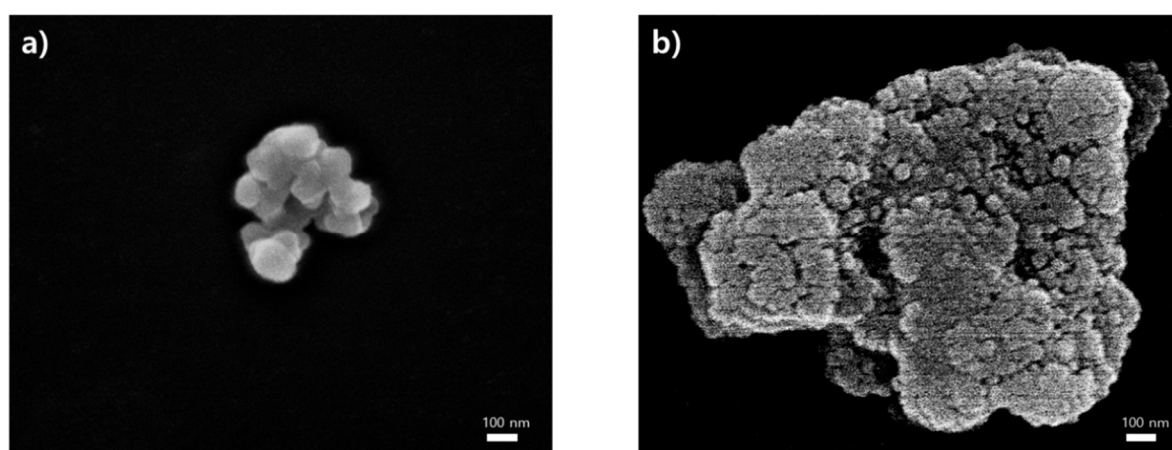

**Figure S1.** SEM images of a) bare  $\text{Co}_3\text{O}_4$  NPs and b) PDA@ $\text{Co}_3\text{O}_4$  NPs. Scale bar: 100 nm.

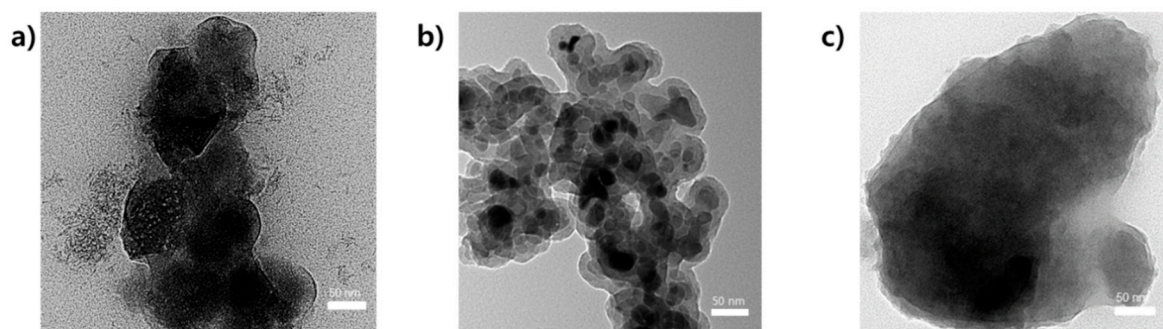

**Figure S2.** TEM images of a) 0.5-PDA@ $\text{Co}_3\text{O}_4$  NPs, b) 1-PDA@ $\text{Co}_3\text{O}_4$  NPs, and c) 2-PDA@ $\text{Co}_3\text{O}_4$  NPs. Scale bar: 50 nm.

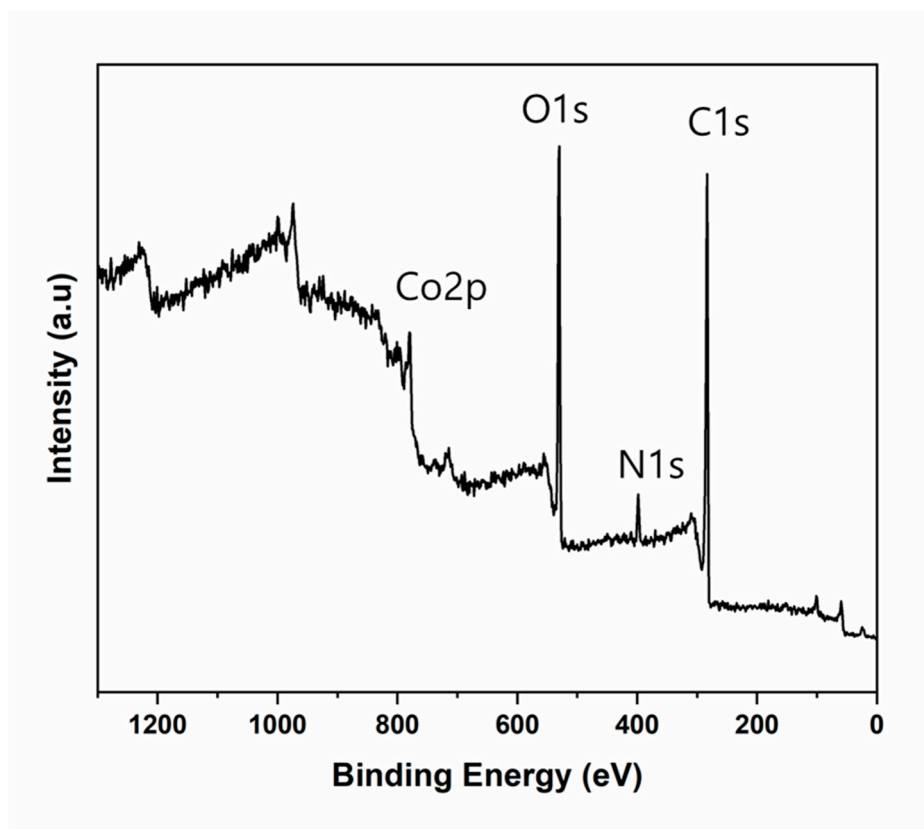

Figure S3. XPS spectra of PDA@Co<sub>3</sub>O<sub>4</sub> NPs.

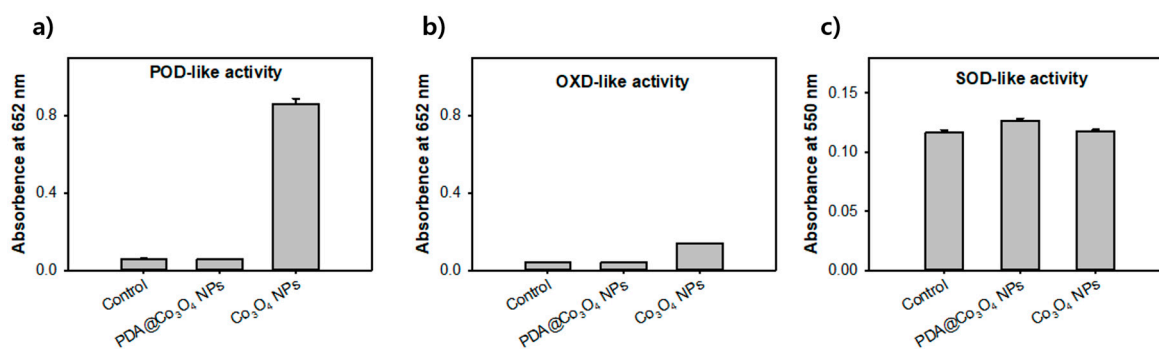

Figure S4. Evaluations for the other oxidoreductase-like activities of PDA@Co<sub>3</sub>O<sub>4</sub> NPs and bare Co<sub>3</sub>O<sub>4</sub> NPs. a) POD-, b) OXD- and c) SOD-like activities.

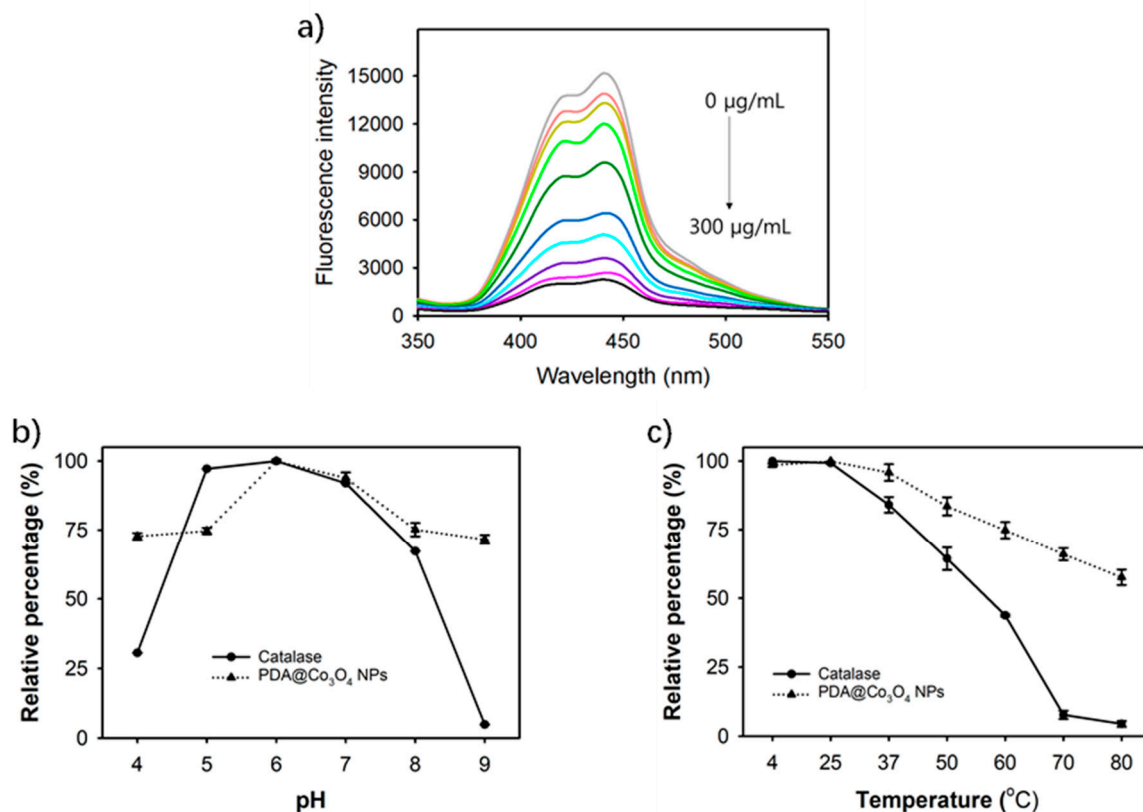

**Figure S5.** Effects of a) concentrations of PDA@Co<sub>3</sub>O<sub>4</sub> NPs, b) pH, and c) temperature on the catalase-like activity of PDA@Co<sub>3</sub>O<sub>4</sub> NPs. Effects of pH and temperature on the activity of natural catalase were compared.

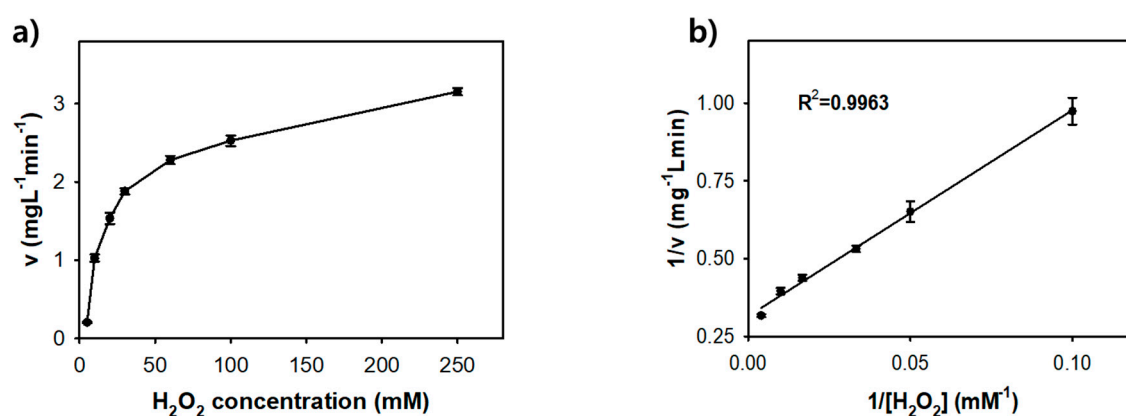

**Figure S6.** a) Michaelis-Menten curve for the catalase-like activity of PDA@Co<sub>3</sub>O<sub>4</sub> NPs at diverse concentrations of  $\text{H}_2\text{O}_2$  and b) their corresponding Lineweaver-Burk plots ( $n=3$ ).

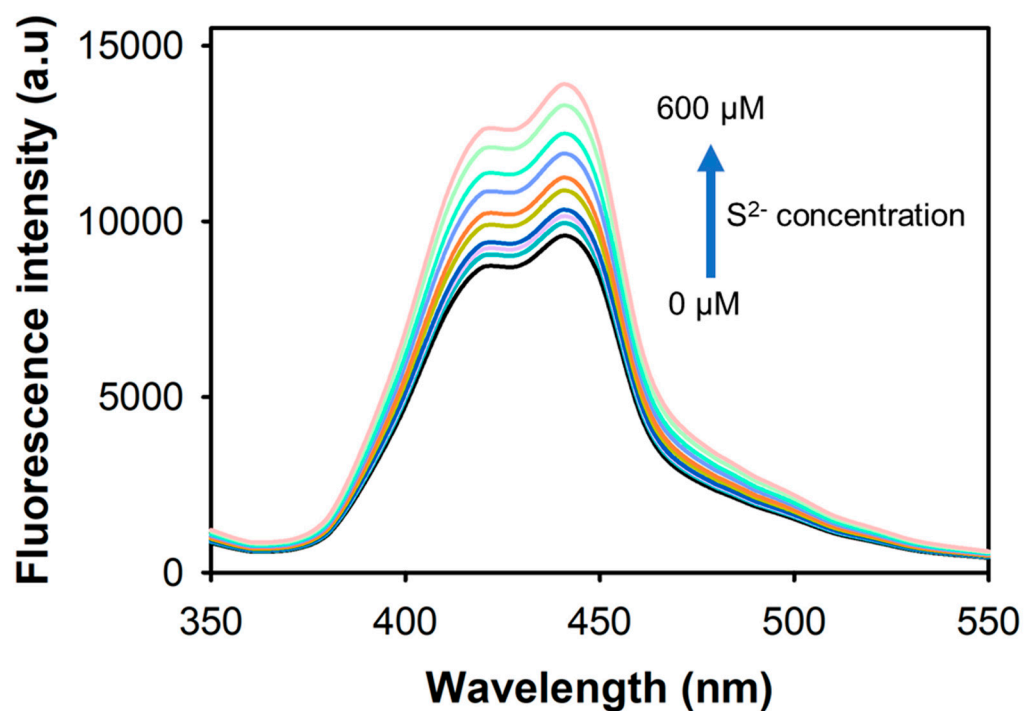

Figure S7. Fluorescence spectra of PDA@Co<sub>3</sub>O<sub>4</sub> NPs-based biosensor toward diverse concentrations of  $S^{2-}$ .

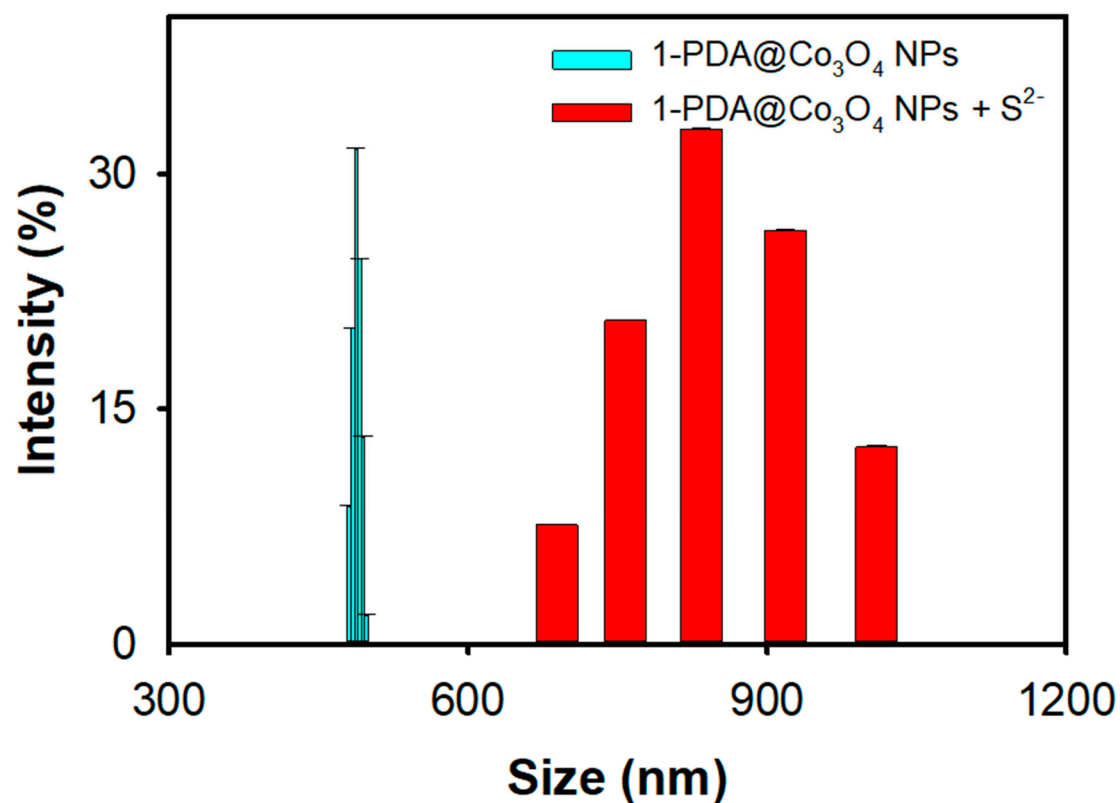

Figure S8. Particle size distributions of PDA@Co<sub>3</sub>O<sub>4</sub> NPs in the absence and presence of  $S^{2-}$  (1 mM).

**Table S1.** Elemental composition ratio of PDA@Co<sub>3</sub>O<sub>4</sub> NPs.

| Element | Weight % | Atomic % |
|---------|----------|----------|
| C       | 36.68    | 57.90    |
| N       | 3.39     | 4.59     |
| O       | 21.10    | 25.01    |
| Co      | 38.83    | 12.50    |

**Table S2.** Comparison of the kinetic parameters of catalase-like PDA-Co<sub>3</sub>O<sub>4</sub> NPs with those of natural catalase and previously reported Co<sub>3</sub>O<sub>4</sub>-based nanozymes.

| Catalyst                                  | K <sub>m</sub> (mM) | V <sub>max</sub> (10 <sup>-5</sup> M/s) | References       |
|-------------------------------------------|---------------------|-----------------------------------------|------------------|
| Co <sub>3</sub> O <sub>4</sub> NPs        | 34.3                | 1.12                                    | [1]              |
| Catalase                                  | 54.3                | 1.62                                    |                  |
| Co <sub>3</sub> O <sub>4</sub> nanoplates | 24.7                | 0.24                                    | [2]              |
| Co <sub>3</sub> O <sub>4</sub> nanorods   | 4.82                | 0.19                                    |                  |
| Co <sub>3</sub> O <sub>4</sub> nanocubes  | 63.9                | 0.12                                    |                  |
| PDA@Co <sub>3</sub> O <sub>4</sub> NPs    | 22.1                | 0.67                                    | <b>This work</b> |

## References

- [1] Mu, J.; Zhang, L.; Zhao, M.; Wang, Y. Co<sub>3</sub>O<sub>4</sub> nanoparticles as an efficient catalase mimic: Properties, mechanism and its electrocatalytic sensing application for hydrogen peroxide, *J. Mol. Catal. A-Chem.* **2013**, *378*, 30-7.
- [2] Mu, J.; Zhang, L.; Zhao, M.; Wang, Y. Catalase mimic property of Co<sub>3</sub>O<sub>4</sub> nanomaterials with different morphology and its application as a calcium sensor, *ACS Appl. Mater. Interfaces.* **2014**, *6*, 7090-8.
